# Supplementary material for: Necrostatin-1 Supplementation to Islet Tissue Culture Enhances the In-Vitro Development and Graft Function of Young Porcine Islets
Source: MDPI journal article supplement (doi:10.3390/ijms22168367), 2021-08-04
Supplement: s1 [file s1]

**Supplementary Table S1. List of all antibodies used for the analysis of islets via flow cytometry.**

| <b>Antibody</b>                                     | <b>Catalog # and Manufacturer</b>             | <b>Dilution</b> | <b>Target</b>                                                                                                                                                                              |
|-----------------------------------------------------|-----------------------------------------------|-----------------|--------------------------------------------------------------------------------------------------------------------------------------------------------------------------------------------|
| <b>PE-conjugated anti-insulin</b>                   | <b>Cat #8508, CST, Danvers, MA</b>            | <b>1:50</b>     | <b>Beta cells</b>                                                                                                                                                                          |
| <b>APC-conjugated anti-glucagon</b>                 | <b>Cat #NBP2-21803AF647, Novus Biological</b> | <b>1:100</b>    | <b>Alpha cells</b>                                                                                                                                                                         |
| <b>Alexa Fluor 488-conjugated anti-somatostatin</b> | <b>Cat #566032, BD Biosciences</b>            | <b>1:50</b>     | <b>Delta cells</b>                                                                                                                                                                         |
| <b>FITC-conjugated anti-GLUT2</b>                   | <b>Cat #FAB1414G-100UG, Novus Biological</b>  | <b>1:100</b>    | <b>Double staining with anti-insulin antibody to identify GLUT2-positive, insulin-positive beta cells</b>                                                                                  |
| <b>FITC-conjugated anti-Neurogenin 3 (Ngn3)</b>     | <b>Cat #bs-0922R, Bioss</b>                   | <b>1:133</b>    | <b>Ngn3-positive pancreatic progenitor cells</b>                                                                                                                                           |
| <b>APC-conjugated anti-Nkx6.1</b>                   | <b>Cat #563338, BD Pharmingen</b>             | <b>1:33</b>     | <b>Nkx6.1-positive pancreatic progenitor cells</b>                                                                                                                                         |
| <b>PE-conjugated anti-Ki-67</b>                     | <b>Cat #12-5698-82, Invitrogen</b>            | <b>1:100</b>    | <b>Double staining with anti-glucagon and anti-somatostatin antibodies to identify Ki-67-positive, glucagon-positive alpha cells and Ki-67-positive, somatostatin-positive delta cells</b> |
| <b>eFluor 660-conjugated anti-Ki-67</b>             | <b>Cat #50-5698-82, Invitrogen</b>            | <b>1:100</b>    | <b>Double staining with anti-insulin antibody to identify Ki-67-positive, insulin-positive beta cells</b>                                                                                  |

## **Supplementary Table S2. Values of results mentioned in the manuscript**

### **Figure S1**

Untreated islets on day 3 of culture (control): 100%  
Untreated islets on day 7 of culture:  $50.7 \pm 8.3\%$  of control  
D0 Nec-1 treated islets on day 7 of culture:  $40.6 \pm 10.6\%$  of control  
D3 Nec-1 treated islets on day 7 of culture:  $88.7 \pm 3.3\%$  of control

### **Figure S2**

Untreated islets on day 3 of culture:  $31.3 \pm 2.5$  pg/ng DNA  
Untreated islets on day 7 of culture:  $40.3 \pm 7.1$  pg/ng DNA  
D0 Nec-1 treated islets on day 7 of culture:  $105.1 \pm 25.2$  pg/ng DNA  
D3 Nec-1 treated islets on day 7 of culture:  $116.5 \pm 22.4$  pg/ng DNA

### **Figure S3A-B**

Untreated islets on day 3 of culture:  $4.9 \pm .3\%$   
Untreated islets on day 7 of culture:  $7.9 \pm 1.1\%$   
D0 Nec-1 treated islets on day 7 of culture:  $15.1 \pm 1.6\%$   
D3 Nec-1 treated islets on day 7 of culture:  $17.5 \pm .6\%$

### **Figure S3C-D**

Untreated islets on day 3 of culture:  $21.4 \pm 4.8\%$   
Untreated islets on day 7 of culture:  $31.4 \pm 3.0\%$   
D0 Nec-1 treated islets on day 7 of culture:  $43.6 \pm 8.3\%$   
D3 Nec-1 treated islets on day 7 of culture:  $46.2 \pm 3.9\%$

### **Figure S3E-F**

Untreated islets on day 3 of culture:  $2.3 \pm .6\%$   
Untreated islets on day 7 of culture:  $6.7 \pm .6\%$   
D0 Nec-1 treated islets on day 7 of culture:  $15.4 \pm 1.2\%$   
D3 Nec-1 treated islets on day 7 of culture:  $16.1 \pm .8\%$

### **Figure S3G-H**

Untreated islets on day 3 of culture:  $1.10 \pm .1\%$   
Untreated islets on day 7 of culture:  $2.2 \pm .2\%$   
D0 Nec-1 treated islets on day 7 of culture:  $2.5 \pm .2\%$   
D3 Nec-1 treated islets on day 7 of culture:  $3.0 \pm .3\%$

### **Figure S4A-B**

Untreated islets on day 3 of culture:  $82.4 \pm 6.3\%$

Untreated islets on day 7 of culture:  $62.6 \pm 6.1\%$   
D0 Nec-1 treated islets on day 7 of culture:  $43.2 \pm 4.1\%$   
D3 Nec-1 treated islets on day 7 of culture:  $48.7 \pm 3.0\%$

#### **Figure S4C-D**

Untreated islets on day 3 of culture:  $6.0 \pm 1.3\%$   
Untreated islets on day 7 of culture:  $14.3 \pm 1.0\%$   
D0 Nec-1 treated islets on day 7 of culture:  $6.5 \pm 1.2\%$   
D3 Nec-1 treated islets on day 7 of culture:  $16.4 \pm 1.2\%$

#### **Figure S5A-B**

Untreated islets on day 3 of culture:  $28.4 \pm 2.5\%$   
Untreated islets on day 7 of culture:  $48.6 \pm 4.7\%$   
D0 Nec-1 treated islets on day 7 of culture:  $53.4 \pm 9.2\%$   
D3 Nec-1 treated islets on day 7 of culture:  $87.9 \pm 2.0\%$

#### **Figure S5C-D**

Untreated islets on day 3 of culture:  $68.4 \pm 4.0\%$   
Untreated islets on day 7 of culture:  $68.8 \pm 1.8\%$   
D0 Nec-1 treated islets on day 7 of culture:  $85.6 \pm 2.7\%$   
D3 Nec-1 treated islets on day 7 of culture:  $92.0 \pm 3.9\%$

#### **Figure S5E-F**

Untreated islets on day 3 of culture:  $55.5 \pm 9.6\%$   
Untreated islets on day 7 of culture:  $40.0 \pm 4.4\%$   
D0 Nec-1 treated islets on day 7 of culture:  $69.7 \pm 8.8\%$   
D3 Nec-1 treated islets on day 7 of culture:  $75.5 \pm 8.9\%$

#### **Figure S6A**

Untreated islets on day 3 of culture: L1:  $.3 \pm .02$  pg/ng DNA/h, H:  $.6 \pm .07$  pg/ng DNA/h, L2:  $.4 \pm .04$  pg/ng DNA/h, and H+:  $1.0 \pm .2$  pg/ng DNA/h  
Untreated islets on day 7 of culture: L1:  $.4 \pm .07$  pg/ng DNA/h, H:  $1.0 \pm .1$  pg/ng DNA/h, L2:  $.5 \pm .06$  pg/ng DNA/h, and H+:  $1.4 \pm .3$  pg/ng DNA/h  
D0 Nec-1 treated islets on day 7 of culture: L1:  $3.2 \pm .2$  pg/ng DNA/h, H:  $6.4 \pm 1.3$  pg/ng DNA/h, L2:  $2.9 \pm .2$  pg/ng DNA/h, and H+:  $6.2 \pm 1.3$  pg/ng DNA/h  
D3 Nec-1 treated islets on day 7 of culture: L1:  $1.3 \pm .1$  pg/ng DNA/h, H:  $5.3 \pm .6$  pg/ng DNA/h, L2:  $1.4 \pm .09$  pg/ng DNA/h, and H+:  $4.5 \pm .3$  pg/ng DNA/h

#### **Figure S6B**

Untreated islets on day 3 of culture:  $1.4 \pm .04$

Untreated islets on day 7 of culture:  $2.5 \pm .2$   
D0 Nec-1 treated islets on day 7 of culture:  $2.5 \pm .3$   
D3 Nec-1 treated islets on day 7 of culture:  $4.2 \pm .5$

#### **Figure S7A**

Untreated islet recipient mice: Week 12: .0%, Week 16: .0%, Week 18: .0%, Week 20: .0%, Week 22: .0%  
D3 Nec-1 treated islet recipient mice: Week 12: 9.1%, Week 16: 18.2%, Week 18: 27.3%, Week 20: 45.5%, Week 22: 45.5%

#### **Figure S7E**

Untreated islet recipient mice:  $36862.0 \pm 1908.0$  (mg/dL)·minutes  
Hyperglycemic D3 Nec-1 treated islet recipient mice:  $32472.0 \pm 1307.0$  (mg/dL)·minutes  
Normoglycemic D3 Nec-1 treated islet recipient mice:  $9517.0 \pm 514.4$  (mg/dL)·minutes

#### **Figure S7F**

Untreated islet recipient mice:  $2.6 \pm .1$  mU/L  
Hyperglycemic D3 Nec-1 treated islet recipient mice:  $2.7 \pm .3$  mU/L  
Normoglycemic D3 Nec-1 treated islet recipient mice:  $5.5 \pm 1.1$  mU/L

#### **Figure S7G**

Before survival nephrectomy:  $6.8 \pm 1.5$  mU/L  
After survival nephrectomy:  $2.2 \pm .07$  mU/L

#### **Supplementary Figure S1**

Untreated islets on day 3 of culture:  $95.6 \pm 1.2\%$   
Untreated islets on day 7 of culture:  $94.8 \pm .9\%$   
D0 Nec-1 treated islets on day 7 of culture:  $97.0 \pm .4\%$   
D3 Nec-1 treated islets on day 7 of culture:  $97.3 \pm .3\%$

#### **Supplementary Figure S2**

Untreated islets on day 3 of culture:  $91.3 \pm 2.2\%$   
Untreated islets on day 7 of culture:  $88.8 \pm 2.8\%$   
D0 Nec-1 treated islets on day 7 of culture:  $92.4 \pm .6\%$   
D3 Nec-1 treated islets on day 7 of culture:  $90.8 \pm .7\%$

#### **Supplementary Figure S3**

Untreated islets on day 3 of culture:  $354.3 \pm 22.3$  nmol/min·mg DNA  
Untreated islets on day 7 of culture:  $338.8 \pm 51.6$  nmol/min·mg DNA  
D0 Nec-1 treated islets on day 7 of culture:  $361.2 \pm 41.8$  nmol/min·mg DNA

D3 Nec-1 treated islets on day 7 of culture:  $310.0 \pm 52.2$  nmol/min·mg DNA

**Supplementary Figure S4E**

Untreated islet recipient mice:  $2.6 \pm .1$  mU/L

D3 Nec-1 treated islet recipient mice:  $4.1 \pm .7$  mU/L

**Supplementary Figure S4I**

Untreated islet recipient mice:  $36862.0 \pm 1908.0$  (mg/dL)·minutes

D3 Nec-1 treated islet recipient mice:  $22038.0 \pm 3685.0$  (mg/dL)·minutes

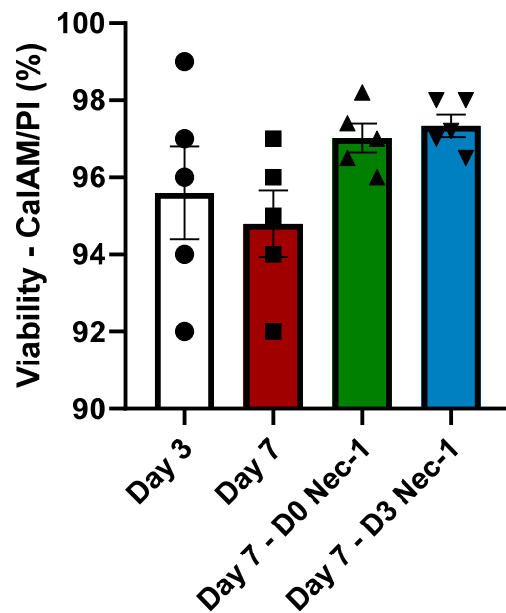

**Supplementary Figure S1. Islet viability on day 3 and 7 of tissue culture in control media or media supplemented with Nec-1 either immediately after islet isolation (D0 Nec-1) or on day 3 of tissue culture (D3 Nec-1).** 100 IEQs were stained with Calcein AM (CalAM) for live cells and propidium iodide (PI) for dead and dying cells for 30 minutes on day 3 and 7 of tissue culture. The islet viability was calculated by the equation:  $\text{CalAM-positive cells} / (\text{CalAM-positive cells} + \text{PI-positive cells}) \times 100$ .  $n=5$  for each group. Data expressed as mean  $\pm$  SEM.

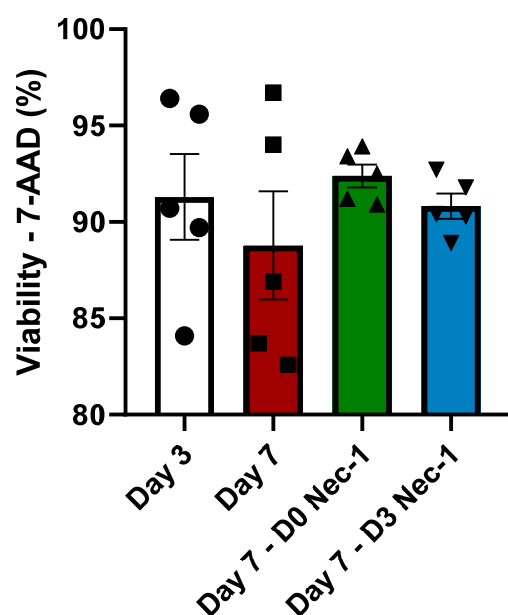

**Supplementary Figure S2. Flow cytometric analysis of the viability of PPIs on day 3 and 7 of tissue culture in control media or media supplemented with Nec-1 either immediately after islet isolation (D0 Nec-1) or on day 3 of tissue culture (D3 Nec-1).** Islets were dissociated on day 3 and 7 of tissue culture using Accutase, stained with 7-AAD viability dye, and analyzed by flow cytometry. n=5 for each group. Data expressed as mean  $\pm$  SEM.

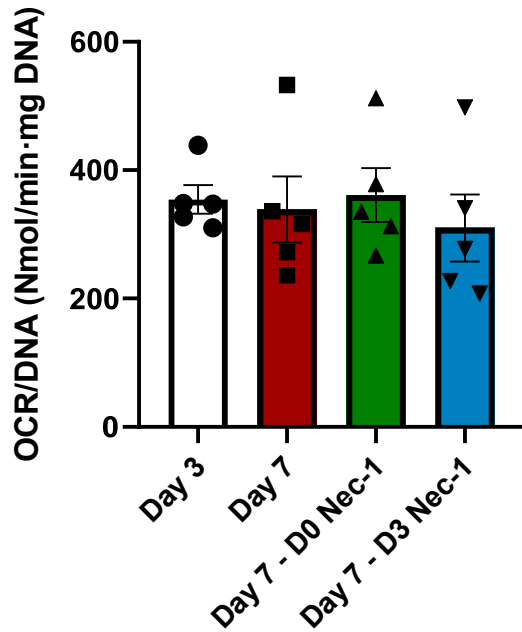

**Supplementary Figure S3. Oxygen consumption rate of PPIs on day 3 and 7 of tissue culture in control media or media supplemented with Nec-1 either immediately after islet isolation (D0 Nec-1) or on day 3 of tissue culture (D3 Nec-1).** 200 IEQs per isolation was evaluated for the oxygen consumption rate on day 3 and 7 of tissue culture using a fiber optic sensor monitoring system and expressed as oxygen consumption rate normalized to the total DNA. n=5 for each group. Data expressed as mean  $\pm$  SEM.



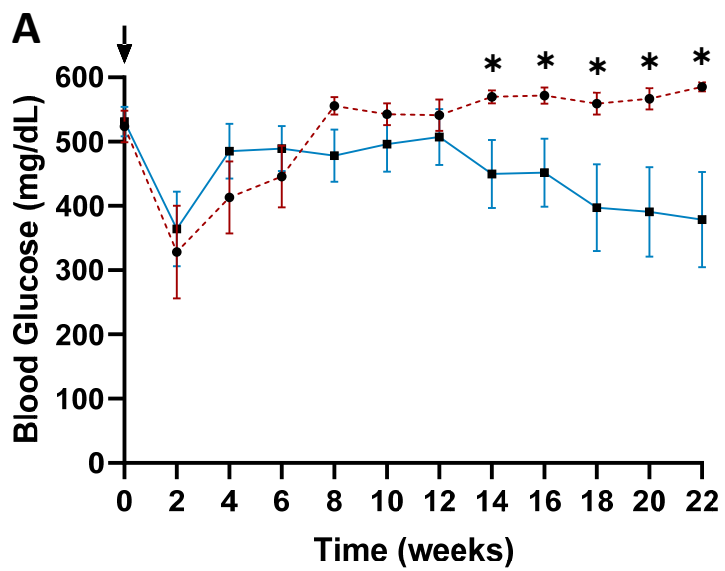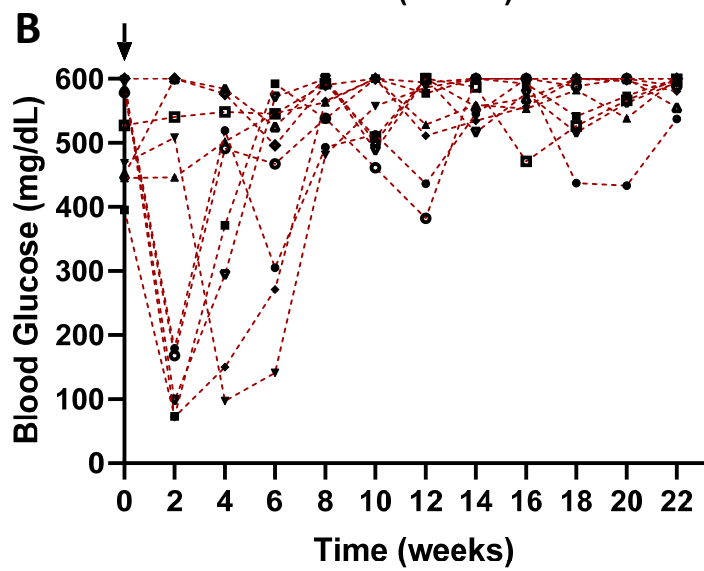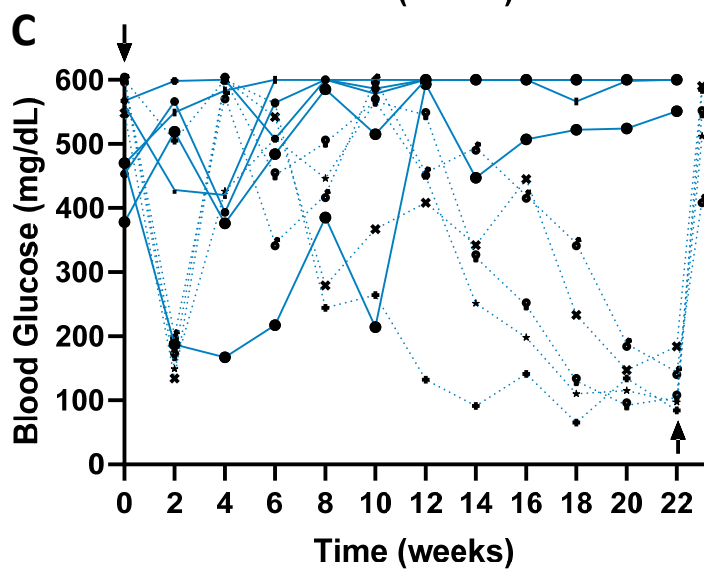

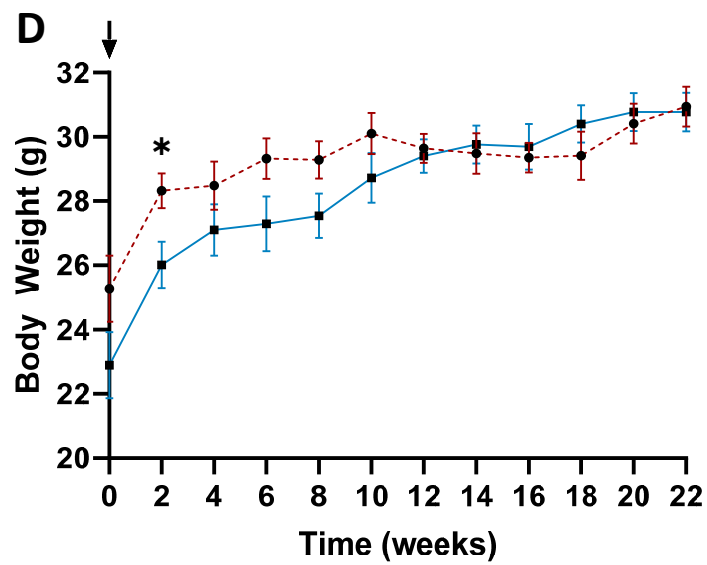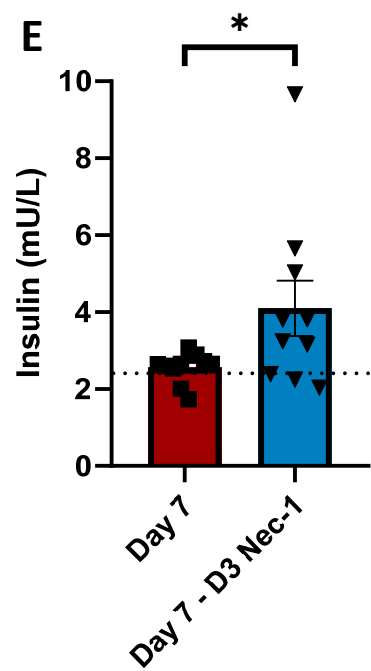

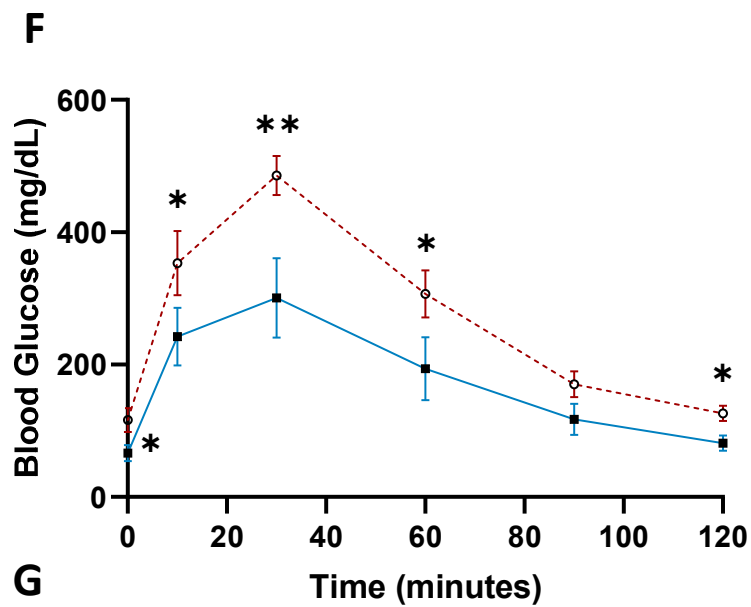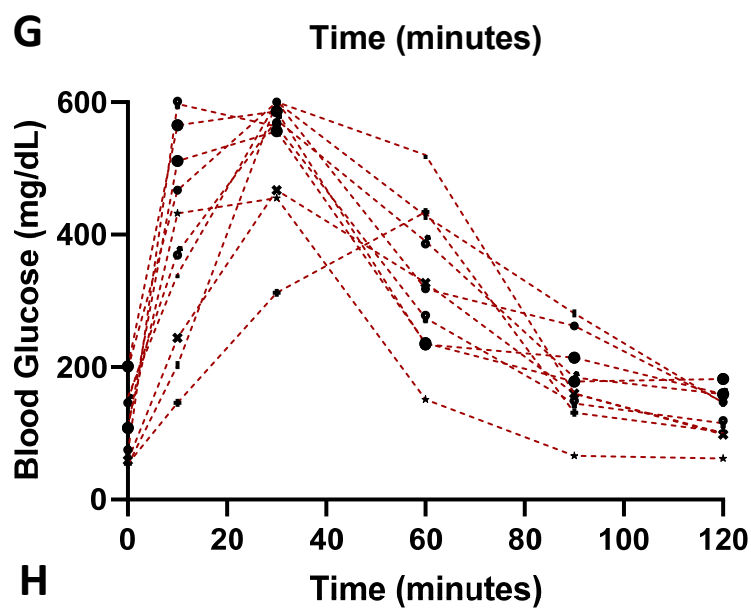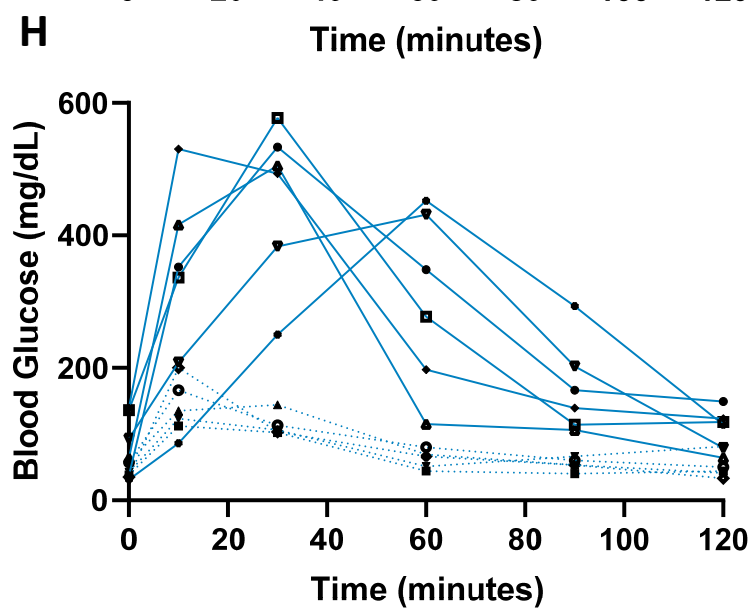

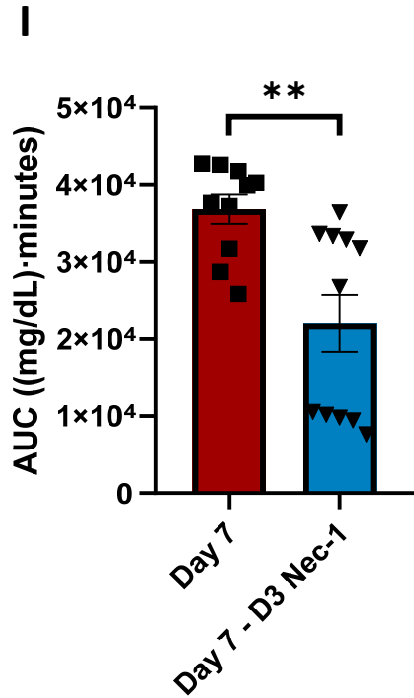

**Supplementary Figure S4. Long-term metabolic follow-up of diabetic athymic nude mice after islet transplantation with PPIs cultured for 7 days in control media (n=10, dashed red line) or media supplemented with Nec-1 on day 3 of tissue culture (n=11, solid blue line).**

Athymic nude mice were rendered diabetic by an intraperitoneal streptozotocin injection, transplanted with 5000 IEQs of PPIs under the kidney capsule, and followed for 22 weeks. A) Average weekly non-fasting blood glucose measurements from 0 to 22 weeks after islet transplantation. B) Weekly non-fasting blood glucose measurements from 0 to 22 weeks of mice transplanted with PPIs cultured for 7 days in control media. C) Weekly non-fasting blood glucose measurements from 0 to 22 weeks of mice transplanted with PPIs cultured for 7 days in media supplemented with Nec-1 on day 3 of tissue culture. D) Average weekly body weight measurements from 0 to 22 weeks after islet transplantation. E) Porcine insulin measurements in serum of mice at 22 weeks after islet transplantation. F) Average blood glucose measurements during an OGTT (3 mg/kg) at 22 weeks after islet transplantation. G) Blood glucose measurements during an OGTT (3 mg/kg) of mice transplanted with PPIs cultured for 7 days in control media at 22 weeks after islet transplantation. H) Blood glucose measurements during an OGTT (3 mg/kg) of mice transplanted with PPIs cultured for 7 days in media supplemented with Nec-1 on day 3 of tissue culture at 22 weeks after islet transplantation. I) Glucose clearance after an OGTT (3 mg/kg) at 22 weeks post-transplantation expressed as AUC. Downward arrows indicate time of implantation of an insulin pellet. Upward arrows indicate time of nephrectomy of graft-bearing kidneys. Dotted black lines indicate the lower limit of the assay range (2.3 mU/L). \*p<.05. \*\*p<.01. Data expressed as mean  $\pm$  SEM.

### **Supplementary Methods – Islet Viability**

To assess islet viability, 100 IEQs were stained in Calcein AM (CalAM, 1:20; cat# C1430, Invitrogen) and propidium iodide (PI, 1:20; cat# P3566, Invitrogen) for 30 minutes and evaluated on a microplate reader (Infinite F200, Tecan)<sup>15</sup>.

### **Supplementary Methods – Oxygen Consumption Rate (OCR)**

200 IEQs were loaded into a titanium chamber connected to a fiber optic oxygen sensor (cat# FOL/C2T175P, Instech Laboratories) and filled with 37°C serum-free RPMI-1640 media<sup>23</sup>. The OCR was calculated as the linear decrease in the partial pressure of oxygen inside the chamber and normalized to the DNA content<sup>25</sup>.
